# Supplementary material for: Viperin, an IFN-Stimulated Protein, Delays Rotavirus Release by Inhibiting Non-Structural Protein 4 (NSP4)-Induced Intrinsic Apoptosis
Source: MDPI journal article supplement (doi:10.3390/v13071324), 2021-07-08
Supplement: s1 [file s1]

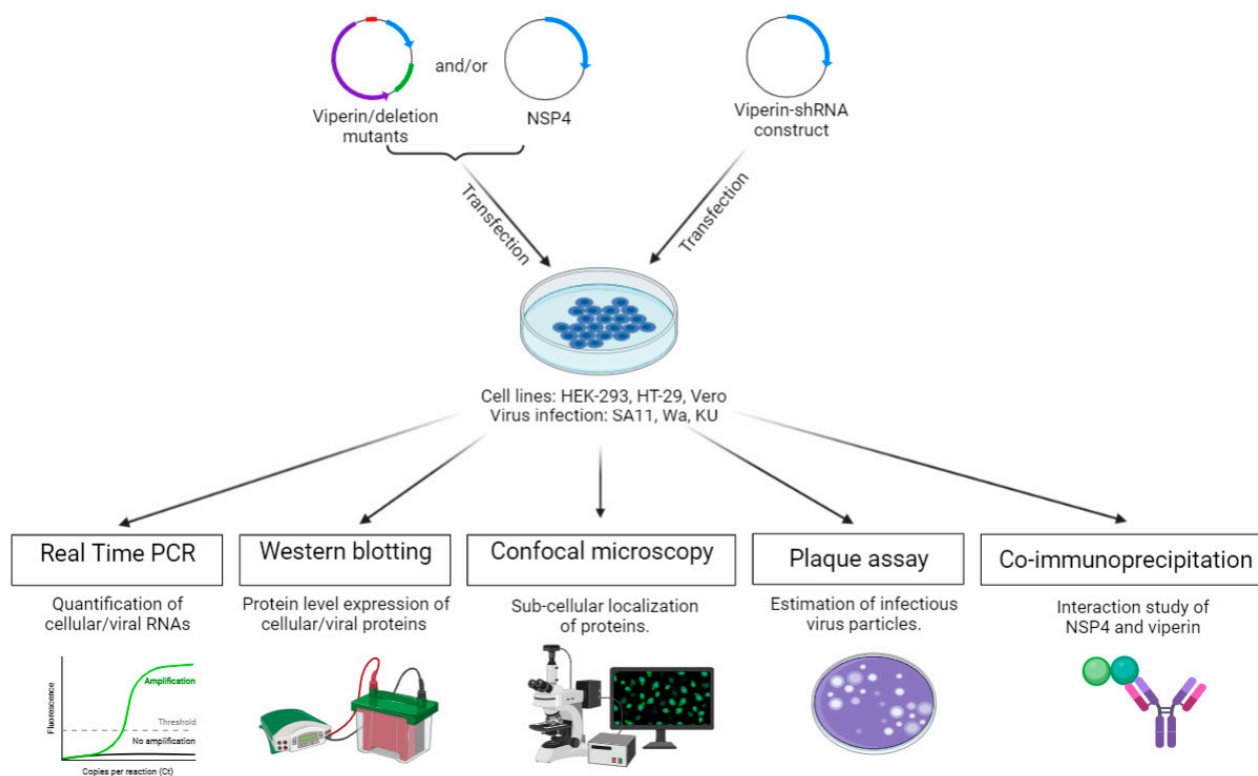

**Figure S1.** Flowchart diagram of the study design.

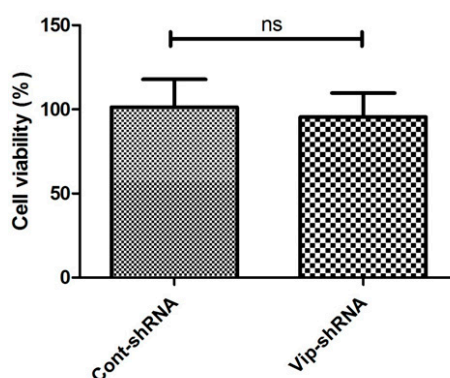

**Figure S2.** Cell viability analysis of viperin knocked down cells. HT-29 cells were transfected with either cont-shRNA or vip-shRNA and incubated for 72 hours. After incubation, cells were subjected to MTT assay to check cell viability. Data was represented as mean  $\pm$  SD of three independent experiments. ns represents *P* value not significant, unpaired student's *t* test.

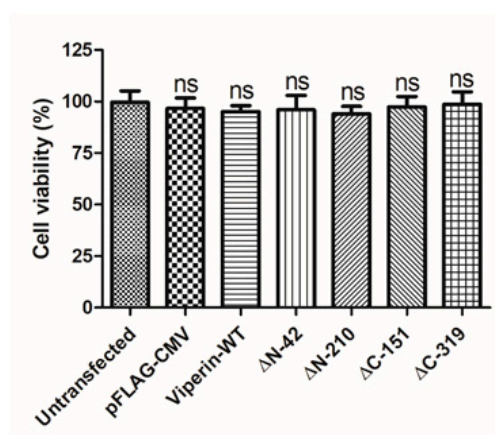

**Figure S3.** Cell viability analysis of HEK-293 cells overexpressing WT-viperin or mutant viperin. HEK-293 cells were transfected with either control vector or vector encoding WT-viperin, ΔN-42 viperin, ΔN-210 viperin, ΔC-151 viperin or ΔC-319 viperin and incubated for 72 hrs. After incubation, cells were subjected to MTT assay to check cell viability. Data was represented as mean ± SD of three independent experiments. ns represents *P* value not significant, unpaired student's *t* test.

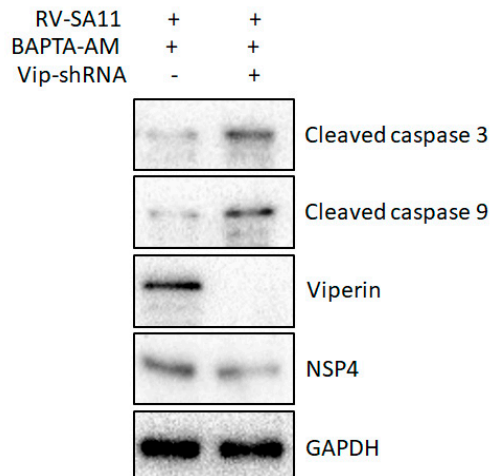

**Figure 4.** Cytoplasmic release of  $Ca^{2+}$  from ER is not influenced by viperin during RV infection. HT-29 cells, transfected with either cont-shRNA or vip-shRNA, were infected with RV-SA11 at an MOI of 3 in the presence of cell permeable chelator BAPTA-AM (50 μM) and incubated for 9 hrs. Next, cell lysates were prepared and subjected to western blot analysis using antibodies specific for cleaved caspase 3, cleaved caspase 9, viperin, NSP4 and GAPDH.
